# Supplementary material for: DNA Damage Reduces the Quality, but Not the Quantity of Human Papillomavirus 16 E1 and E2 DNA Replication
Source: Viruses. 2016 Jun 22;8(6):175. doi: 10.3390/v8060175 (PMC4926195; doi:10.3390/v8060175)
Supplement: Supplementary file 1 [file viruses-08-00175-s001.pdf]

# Supplementary Materials: DNA Damage Reduces the Quality, but Not the Quantity of Human Papillomavirus 16 E1 and E2 DNA Replication

Molly L. Bristol, Xu Wang, Nathan W. Smith, Minkyong P. Son, Michael R. Evans and Iain M. Morgan

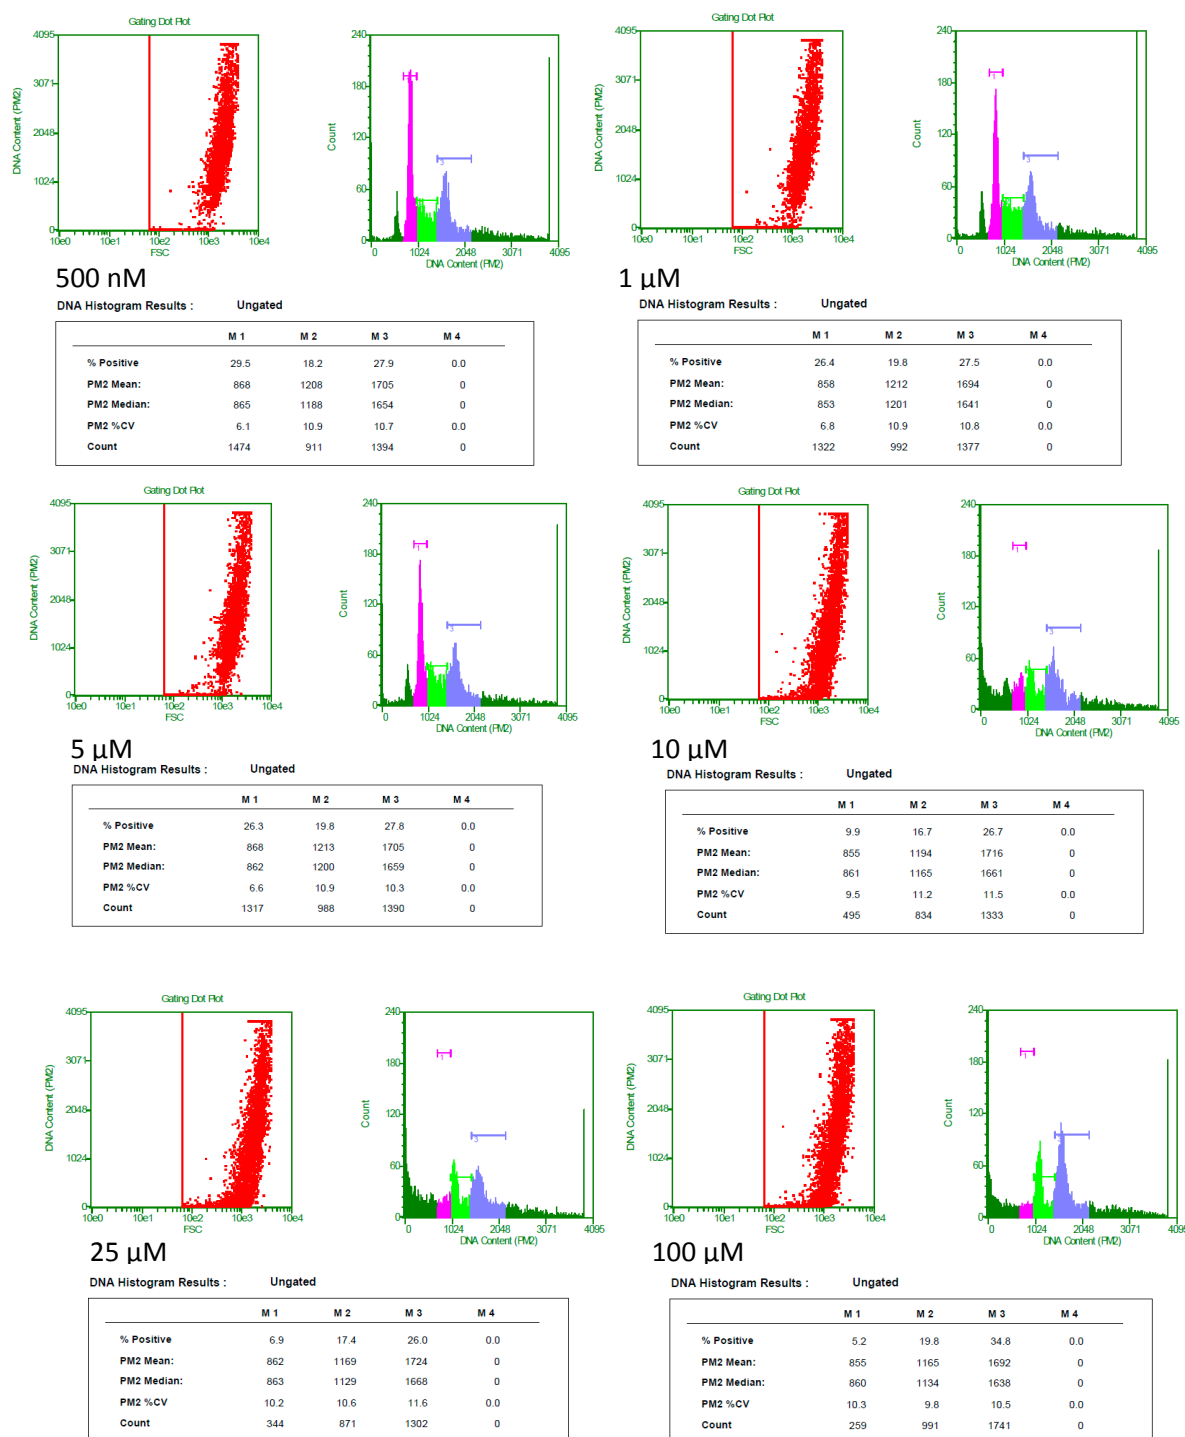

**Figure S1.** Representative FACS analysis of etoposide dose response. C33a cells were plated; Varying doses of etoposide were added to adherent C33a cells (500 nM, 1 μM, 5 μM, 10 μM, 25 μM, 100 μM) 24 hours post plating. 48 hours after the addition of etoposide, cells were harvested and analyzed via FACS.

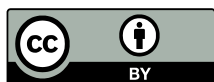

© 2016 by the authors. Submitted for possible open access publication under the terms and conditions of the Creative Commons Attribution (CC-BY) license (<http://creativecommons.org/licenses/by/4.0/>).
